# Supplementary material for: AIM™ platform: A new immunotherapy approach for viral diseases
Source: Frontiers journal article supplement (doi:10.3389/fmed.2022.1070529), 2022-12-23
Supplement: Data_Sheet_1.pdf [file Data_Sheet_1.pdf]

Supplementary Table.

Supplementary Table 1. List of antibodies used for flow cytometry.

| Manufacturer    | Reagent                                             | Catalog No. |
|-----------------|-----------------------------------------------------|-------------|
| Miltenyi Biotec | APC anti-human CD3 clone REA613                     | 130-113-135 |
| Miltenyi Biotec | PE anti-human CD4 clone REA623                      | 130-113-225 |
| Miltenyi Biotec | VioBlue anti-human CD8 clone BW135/80               | 130-113-162 |
| Miltenyi Biotec | PerCP-Vio770 anti-human CD3 clone REA613            | 130-113-141 |
| Miltenyi Biotec | PE anti-human CD8 clone BW135/80                    | 130-113-158 |
| Miltenyi Biotec | VioBlue anti-human TCR $\alpha\beta$ clone REA652   | 130-119-618 |
| Miltenyi Biotec | FITC anti-human TCR V $\delta$ 1 clone REA173       | 130-118-362 |
| Miltenyi Biotec | APC-Vio770 TCR anti-human V $\delta$ 2 clone REA771 | 130-111-013 |
| Miltenyi Biotec | VioBlue anti-human CD3 clone REA613                 | 130-114-519 |
| Miltenyi Biotec | PerCP-Vio770 anti-human CD45RA clone REA562         | 130-113-368 |
| Miltenyi Biotec | FITC anti-human CD62L clone 145/15                  | 130-113-619 |
| Miltenyi Biotec | PE anti-human CD95 clone REA738                     | 130-113-004 |
| Miltenyi Biotec | PE anti-human CD3 clone REA613                      | 130-113-139 |
| Miltenyi Biotec | APC Streptavidin                                    | 130-106-791 |
| Miltenyi Biotec | FITC anti-human CD107a clone REA792                 | 130-111-620 |
| Miltenyi Biotec | PE anti-human IL-2 clone REA689                     | 130-111-303 |
| Miltenyi Biotec | PE-Vio770 anti-human IFN $\gamma$ clone REA600      | 130-113-499 |
| Miltenyi Biotec | APC-Vio770 anti-human TNF $\alpha$ clone aA2        | 130-120-491 |

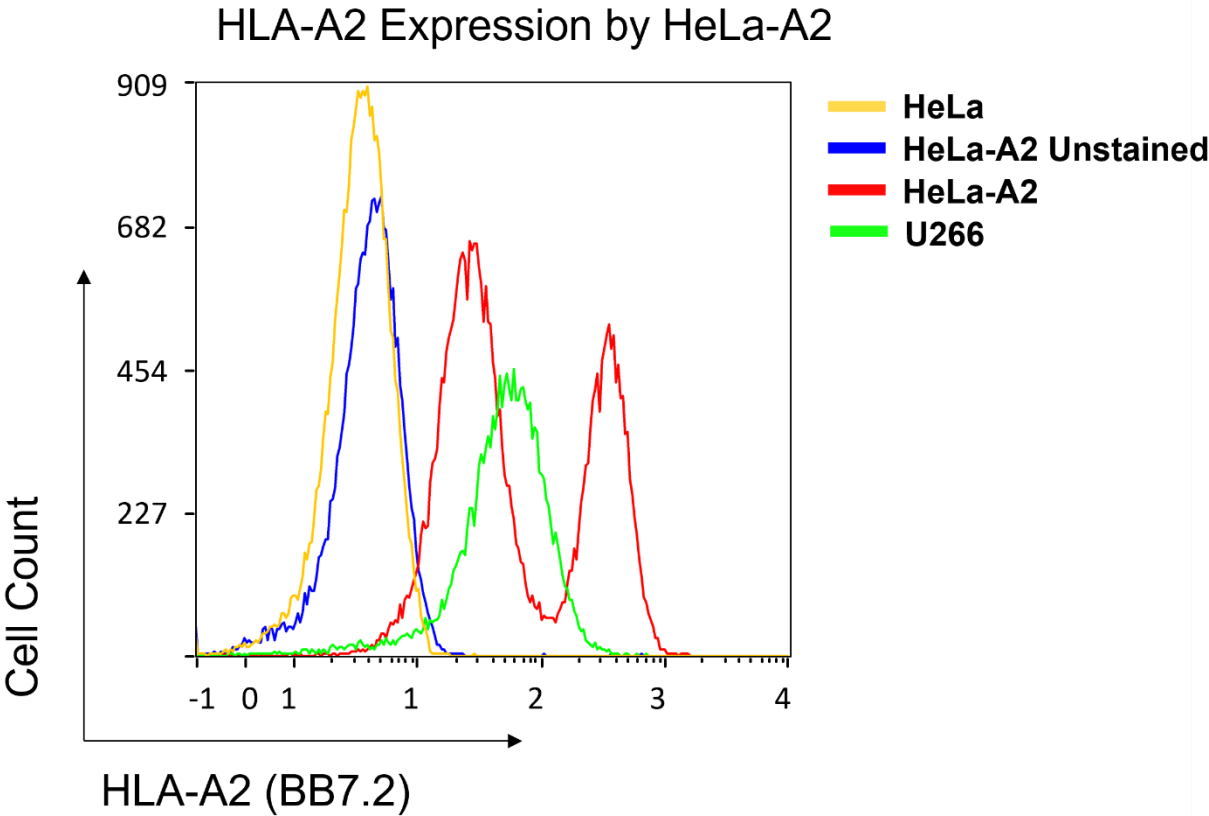

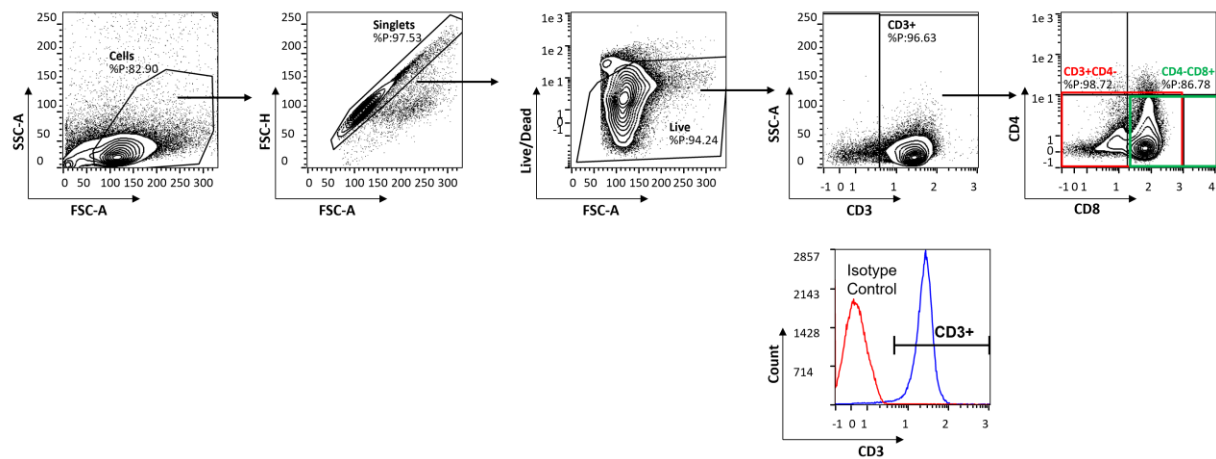

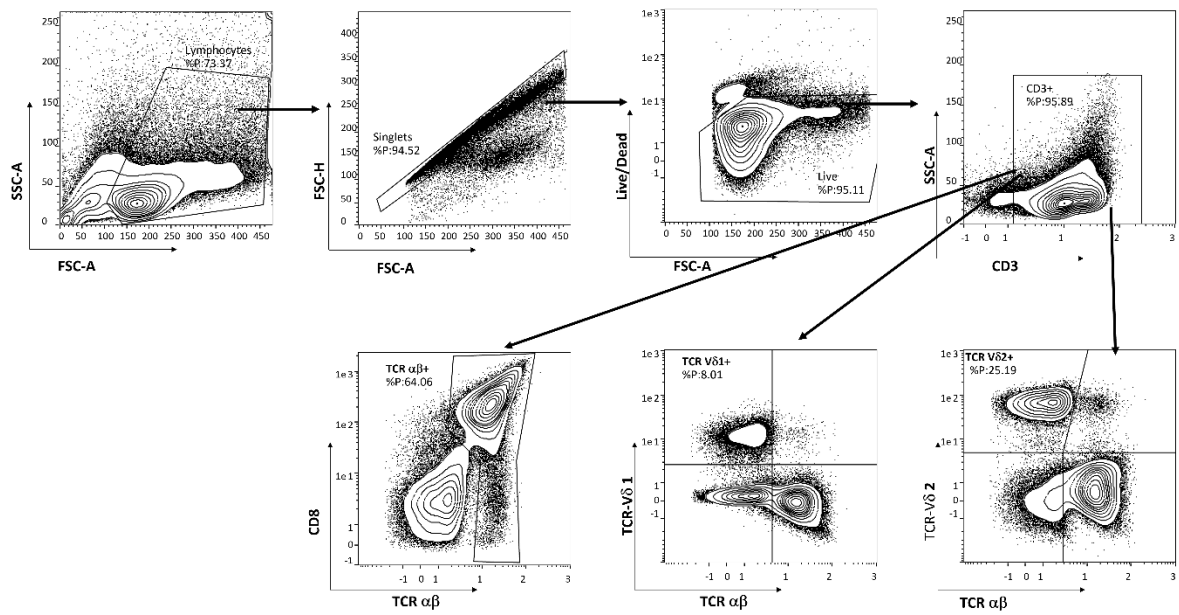

# AIM platform Therapies: AIM nanoparticles for either adoptive cell therapies or as an “off-the-shelf” injectable therapeutic

A different nanoparticle core, but the same T cell engagement, signaling and multi-antigen targeting

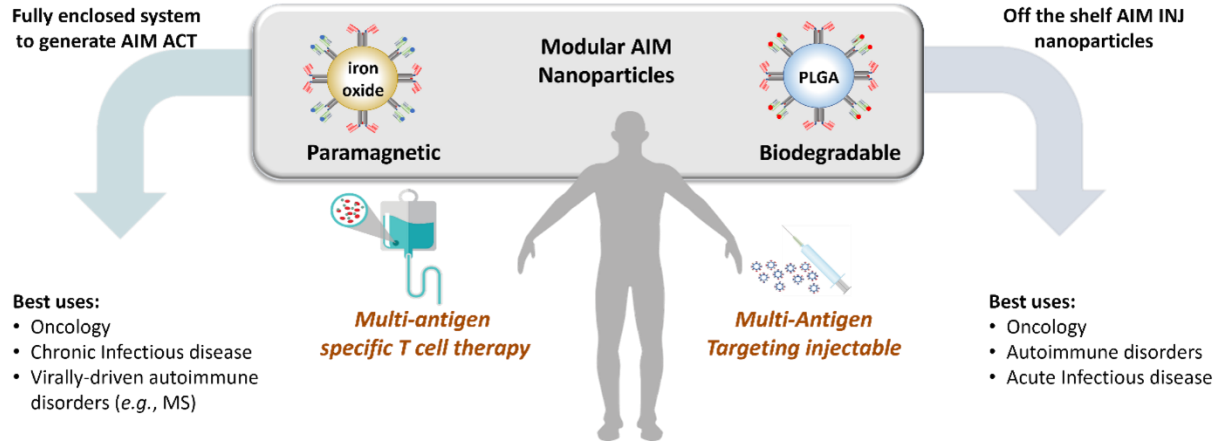

## Supplementary Figure Legends

Supplementary Figure 1. HeLa-A2 cells express HLA-A2. Cells were stained for HLA-A2 expression using anti-human HLA-A2 monoclonal antibody clone BB7.2. Expression by the parental HeLa cell line (yellow line), the HeLa-A2 cell line (red line), and U266 (green line, a human HLA-A\*02:01 cell line) cell line. HeLa-A2 left unstained (blue line).

Supplementary Figure 2. Identity Panel gating strategy for T cell subset frequencies. Gating of total T cells ( $CD3^+$ ),  $CD8^+$  T cells ( $CD3^+/CD4^-CD8^+$ ), and  $CD4^+$  T cells ( $CD3^+/CD4^+$ ).

Supplementary Figure 3. TCR Panel gating strategy for V $\delta$  subset frequencies. Gating of V $\delta$ 1 T cells ( $V\delta 1+\alpha\beta^-$ ) and V $\delta$ 2 T cells ( $V\delta 2+\alpha\beta^-$ ).

Supplementary Figure 4. AIM platform therapies: AIM nanoparticles for either adoptive cell therapies (ACT) or as an off-the-shelf injectable therapeutic (INJ). The AIM nanoparticle can be used as a paramagnetic AIM nanoparticle *ex vivo* to enrich and expand multi-antigen targeted T cells for the AIM ACT product, or as an injectable biodegradable AIM nanoparticles *in vivo* for activating and expanding multi-antigen targeting T cells.
